# Supplementary material for: Severity and Outcomes of SARS-CoV-2 Reinfection Compared with Primary Infection: A Systematic Review and Meta-Analysis
Source: MDPI journal article supplement (doi:10.3390/ijerph20043335), 2023-02-14
Supplement: s1 [file s1]

**Supplementary table s2. Subgroup analysis of comparison of outcomes of SARS-CoV-2 reinfection and primary infection by time interval between two infections**

| <b>Consequences</b> | <b>Number<br/>of data<br/>source</b> | <b>Reinfection<br/>n/N</b> | <b>Primary<br/>infection n/N</b> | <b>OR</b> | <b>95%CI(%)</b> | <b>P-value</b> | <b>I<sup>2</sup>(%)</b> | <b>P-Heterogeneity</b> |
|---------------------|--------------------------------------|----------------------------|----------------------------------|-----------|-----------------|----------------|-------------------------|------------------------|
| Hospitalization     |                                      |                            |                                  |           |                 |                |                         |                        |
| ≥ 90 days           | 3                                    | 187/14,205                 | 33,105/324,990                   | 0.33      | 0.11-1.00       | <0.05          | 95.3                    | <0.05                  |
| ≥ 28 days           | 1                                    | 6/32                       | 19/992                           | 11.82     | 4.36-32.03      | <0.05          | -                       | -                      |
| Admission to ICU    |                                      |                            |                                  |           |                 |                |                         |                        |
| ≥ 90 days           | 1                                    | 11/408                     | 1618/58,811                      | 0.98      | 0.54-1.79       | >0.05          | -                       | -                      |
| ≥ 28 days           | 1                                    | 10/32                      | 2/992                            | 225       | 46.54-1087.86   | <0.05          | -                       | -                      |
| Death               |                                      |                            |                                  |           |                 |                |                         |                        |
| ≥120 days           | 1                                    | 1/40                       | 584/15,424                       | 0.65      | 0.09-4.75       | >0.05          | -                       | -                      |
| ≥ 90 days           | 4                                    | 29/2931                    | 4578/776,907                     | 0.89      | 0.33-2.82       | >0.05          | 75.8                    | <0.05                  |
