# Supplementary material for: Severity and Outcomes of SARS-CoV-2 Reinfection Compared with Primary Infection: A Systematic Review and Meta-Analysis
Source: Int J Environ Res Public Health. 2023 Feb 14;20(4):3335. doi: 10.3390/ijerph20043335 (PMC9961977; doi:10.3390/ijerph20043335)
Supplement: Supplementary file 1 [file ijerph-20-03335-s001.zip › supplementary Table S1.xls]

## Sheet: Supplementary table 1.
	Supplementary table s1. Characteristics of the included studies
	Record number	The first author	Article type	Publication time	Study design	Country	Region	Object of study	Defination of SARS-CoV-2 reinfection	Time interval between two infections in the defination of SARS-CoV-2 reinfection	SARS-CoV-2 reinfection			SARS-CoV-2 primary infection			Time interval between two infections of the included cases (days)	Characteristics of the included SARS-CoV-2 reinfection cases								NOS stars	Risk of bias
											Cases of SARS-CoV-2 reinfection (n)	Inclusion time range of subjects	Dominant variant	Cases of SARS-CoV-2 primary infection (n)	Inclusion time range of subjects	Dominant variant		Median age (IQR)	Mean age (SD)	Sex ratio （M/F）	BMI(SD)	≥1 comorbidity (n/N)	Smoking status, n(%)	Vaccination status, n(%)	Vaccine type
	1	Stefan Pilz	Published article	2021-02-21	Retrospective observational cohort study	Austria	-	General population	Patients who had a positive polymerase chain reaction (PCR) test during both, the first and second infection wave are referred to here as patients with ‘tentative re‐infections'.	≥ 120 days	40	2020/9/1-2020/11/30	-	15424	2020/2/22-2020/4/30	-	212±25	39.8(25.9-54.5)	-	15/25	-	-	-	-	-	7	low
	2	Philippe Brouqui	Published article	2021-03-17	Retrospective observational cohort study	France	Marseille	General population	Patients who had two positive SARS‐CoV‐2 qRT‐PCRs on nasopharyngeal samples collected more than 90 days apart and clinical recovery and at least one negative qPCR after the first positive.	≥ 90 days	46	2020/6/15-2021/1/12	Marseille 4_20A/18877T-1a:19/46, in progress: 17/46, others: 5/46	6771	2020/1/27-2020/5/5	(Wuhan-Hu-1) NC_045512.2: 32/46, Marseille 4_20A/18877T-1a: 3/46	172(90-308)	-	50(22)	25/21	-	15/39	Smoker:1	-	-	7	low
	3	Megan M Sheehan	Published article	2021-03-15	Retrospective cohort study	USA	Ohio and Florida	General population	Any positive test >90 days after the initial infection was considered to be a reinfection.	> 90 days	62	-2021/2/24	-	8845	2020/3/12-2020/8/30		138.9±46.3	-	55.9(20.4)	578/700	-	-	-	-	-	8	low
	4	Sivan Gazit	Published article	2022-02-15	Retrospective cohort study	Israel	-	People aged 16 years or older	This 3-month washout period was enforced to capture reinfections (as opposed to prolonged viral shedding) by following the 90-day guideline of the U. S. Centers for Disease Control and Prevention.	≥ 90 days	1374	-2021/12/13	Alpha (B.1.1.7) and Delta (B.1.617.2）	107413	2020/3/1-	Alpha (B.1.1.7) and Delta (B.1.617.2）	-	-	-	-	-	-	-	Vaccinated a single dose of BNT162b2: 60164, Unvaccinated: 1984093	BNT162b2	8	low
	5	Priscilla Kim	Published article	2021-12-03	Retrospective cohort study	USA	Ohio and Florida	General population	Reinfection is defined as occurring >90 days after initial testing	> 90 days	40	2021/7/1-2021/9/9	Delta	50327	2020/3/9-2020/12/31		300.4±75.7	-	50.6(23.4)	1137/1575	-	-	-	-	-	8	low
	6	Anna A Mensah	Published article	2022-01-25	Retrospective cohort study	England	-	General population	Sequential positive PCR or LFD SARS-CoV-2 tests with a minimum interval of 90 days.	≥ 90 days	13960	-2021/5/2	75% Alpha, and 25% Delta plus other variants	3860054	2020/1/27-	75% Alpha, and 25% Delta plus other variants	-	48(31-65)	-	4607/9353	-	-	-	Unvaccinated: 5858/13636	-	9	low
	7	Fatemah Alhaddad	Published article	2022-06-27	Retrospective cohort study	Kuwait	-	Children younger than 12 years	Having two or more positive SARS-CoV-2 PCR tests done on a respiratory sample, at least 45 days apart	≥ 45 days	30	-2021/3/6	-	14320	2020/2/18-	-	83(62–128.75)	8.5(3.7-10.3)	-	9/21	-	-	-	-	-	8	low
	8	Oriol Yuguero	Published article	2022-06-27	Retrospective cohort study	Spain	Lleida	General population	Patients with positive SARS-CoV-2 PCR tests separated by at least 90 days plus a negative test result between both infection episodes.	≥ 90 days	14	-2021/11/1	-	20534	2021/3/1-	-	-	41.5(13.0-103)	-	2/12	-	-	Smoker: 0	-	-	7	low
	9	Snežana Medić	Published article	2022-07-01	Retrospective case-control study	Serbia	Vojvodina	People aged 18 and older	The detection of SARS-CoV-2 RNA or antigen in nasopharyngeal swab specimens after ≥90 days from the first episode, regardless of the presence of symptoms.	≥ 90 days	13792	2021/1/1-	-	362650	2020/3/6-2020/12/31	-	340±101(90-662)	-	41.61(14.43)	5795/7997	-	11514/13792	-	Unvaccinated: 13,207 Partially vaccinated: 238 Fully vaccinated: 325 Boosted: 22	-	9	low
	10	Sumit Malhotra	Published article	2022-01-07	Retrospective cohort study	India	New Delhi	Health care workers	Any HCW who tested positive for SARS-CoV-2 on 2 separate occasions by either molecular testing (rt–PCR test, cartridge-based nucleic acid amplification test) or a rapid antigen test, at least 90 days apart.	≥ 90 days	124	-2021/6/18	Delta (B.1.617.2.)	4978	2020/3/3-	-	233(175-321)	-	35.5(9.8)	66/58	-	33/426	-	Unvaccinated: 472 Partially vaccinated: 356 Fully vaccinated: 1089	BBV152	7	low
	11	Kevin B Spicer	Published article	2021-10-12	Cohort study	USA	Kentucky	People aged 20 and older	-	≥ 90 days	593	-2020/12/31	-	41647	2020/3/6-2020/8/31	-	-	-	-	220/373	-	-	-	-	-	8	low
	12	Jillian N Armstrong	Published article	2021-08-21	Retrospective cohort study	USA	Connecticut	The old	People whp had repeat positive tests ≥90 days following an initial positive test.	≥ 90 days	156	2020/3/15-2020/12/15	-	11644	-	-	135(110-185)	75(66-86)	-	65/91	-	-	-	-	-	6	moderate
	13	Josè Vitale	Published article	2021-05-28	Cohort study	Italy	Lombardy	General population	A second RT-PCR positivity beyond 90 days after complete resolution of the first infection and with at least 2 consecutive negative test results between episodes.	≥ 90 days	5	-2020/7/1	-	1579	2020/2/1-	-	230±90	63(50-78)	62(18)	808/771	-	-	-	-	-	7	low
	14	Laith J Abu-Raddad	Published article	2021-11-24	Cohort study	Qatar	-	General population	Reinfection was defined as the first PCR-positive swab obtained at least 90 days after the primary infection.	≥ 90 days	1304	-2021/4/28	B.1.351: 413 (31.7%), B.1.1.7: 57 (4.4%), wild-type: 213(16.3%), unknown: 621(47.6%)	-	2020/2/28-	B.1.1.7 (or alpha) and B.1.351 (or beta)	277(179-315)	32(26-39)	-	1130/174	-	-	-	-	-	8	low
	15	Anna A Mensah	Published article	2022-03-28	Prospective national surveillance study	England	-	People aged 16 and younger	A subsequent positive SARS-CoV-2 RT-PCR or LFD test result at least 90 days from the previous positive test.	≥ 90 days	2324	-2021/7/31	Alpha (B.1.1.7) and delta (B.1.617.2)	688418	2020/1/27-	Alpha (B.1.1.7) and delta (B.1.617.2)	-	13(10-15)	-	1174/1160	-	-	-	-	-	8	low
	16	Yusuf Arslan	Published article	2022-03-25	Retrospective cohort study	Turkey	Batman Province	General population	Cases with COVID‐19 real‐time RT‐PCR positivity, with or without COVID‐19–like symptoms, at least 90 days after the first infection/disease.	≥ 90 days	421	-2021/8/21	-	58811	2020/3/1-	-	290.5±105.3(90-498)	-	38.0(16.0)	200/208	-	127/408	-	Unvaccinated: 272(66.7) One dose of Sinovac: 13 (3.2) Two doses of Sinovac: 39 (9.6) Two doses of Sinovac, one dose of Pfizer/BioNTech: 12 (2.9) One dose of Pfizer/BioNTech: 46 (11.3) Two doses of Pfizer/BioNTech: 20 (4.9)		8	low
	17	M E Flacco	Published article	2021-09-08	Retrospective cohort study	Italy	Pescara province	Peopel aged 1 and older	A new positive PCR test occurring ≥90 days after complete resolution of the first infection, and with ≥2 consecutive negative test results between episodes.	≥ 90 days	24	-2021/5/21	-	7173	2020/3/3-	-	201(90-414)	-	54.5(18.4)	-	-	-	-	-	-	6	moderate
	18	Alessio Cortellin	Published article	2022-08-22	Prospective cohort study	UK, Italy, Spain, France, Belgium and Germany	-	Patients with cancer	-	-	34	-2021/12/22	-	3108	2020/2/27-2021/11/30	-	152(40-620)	-	-	16/18	-	26/34	Never smokers: 13(38.2) Former/current smokers: 16(47.1) Unknown: 5(14.7)	Unvaccinated 33 (97.1) Fully vaccinated: 0(0) Partially vaccinated 1 (2.9)	-	6	moderate
	19	Oktay Ünsal	Published article	2021-11-26	Cohort study	Turkey	-	Patients older than the age of 18 with a diagnosis of solid cancers	At least 28-day time interval was defined as a threshold for reinfection.	≥ 28 days	32	2020/6/1-2020/12/31	-	1024	-	-	46(30-194)	63.5(32-93)	-	19/13	-	20/32	-	-	-	6	moderate
